# Supplementary material for: Laser Shock Fabrication of Nitrogen Doped Inverse Spinel Fe3O4/Carbon Nanosheet Film Electrodes towards Hydrogen Evolution Reactions in Alkaline Media
Source: MDPI journal article supplement (doi:10.3390/ijms23137477), 2022-07-05
Supplement: s1 [file s1]

## Supporting information

# Laser Shock Fabrication of Nitrogen Doped Inverse Spinel Fe<sub>3</sub>O<sub>4</sub>/Carbon Nanosheet Film Electrodes towards Hydrogen Evolution Reactions in Alkaline Media

Dun Wu, Jiaming Zhao, Junfeng Cheng, Chunlin Liu and Qiang Wang \*

Jiangsu Key Laboratory of Environmentally Friendly Polymeric Materials,  
School of Materials Science and Engineering, Changzhou University, Changzhou  
213164, China; wudun@cczu.edu.cn (D.W.); 20085600106@smail.cczu.edu.cn  
(J.Z.); junfeng@cczu.edu.cn (J.C.); chunlin@cczu.edu.cn (C.L.)

\* Correspondence: wq@cczu.edu.cn, Tel.: +86-519-86330100

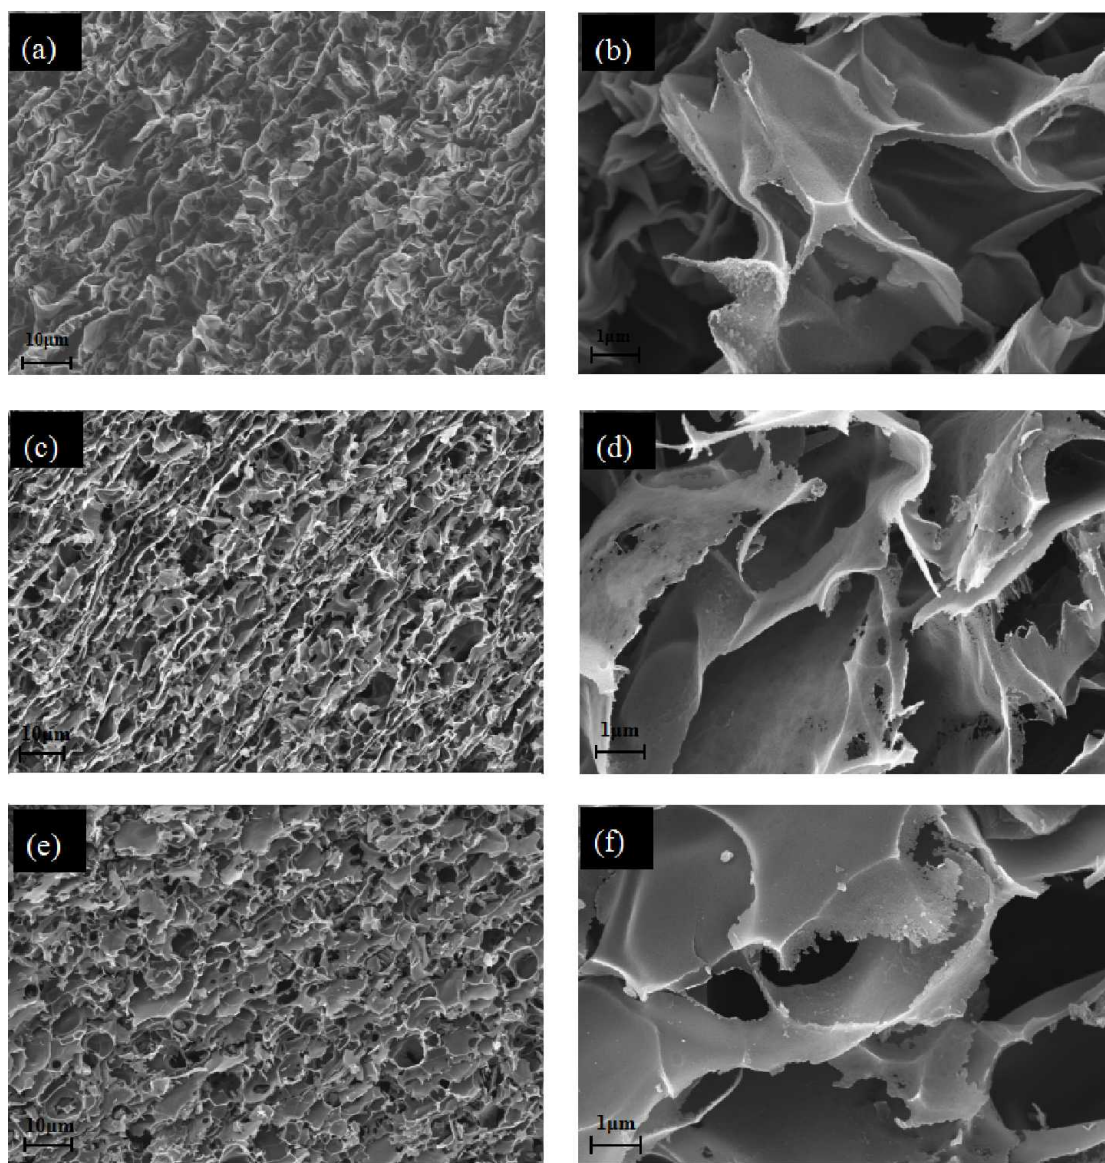

**Figure S1. SEM of PI/Fe<sub>3</sub>O<sub>4</sub> composite film ablated by laser: (a)(b) 0 wt% Fe<sub>3</sub>O<sub>4</sub>, (c)(d) 0.3 wt% Fe<sub>3</sub>O<sub>4</sub>, (e)(f) 0.5 wt% Fe<sub>3</sub>O<sub>4</sub>**

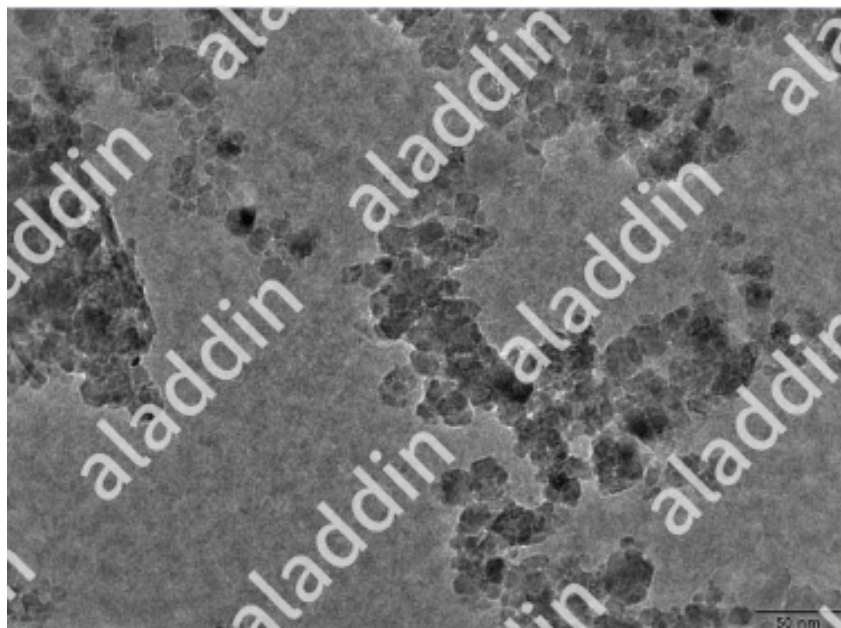

**Figure S2.** The typical TEM image of Nano-Fe<sub>3</sub>O<sub>4</sub>.

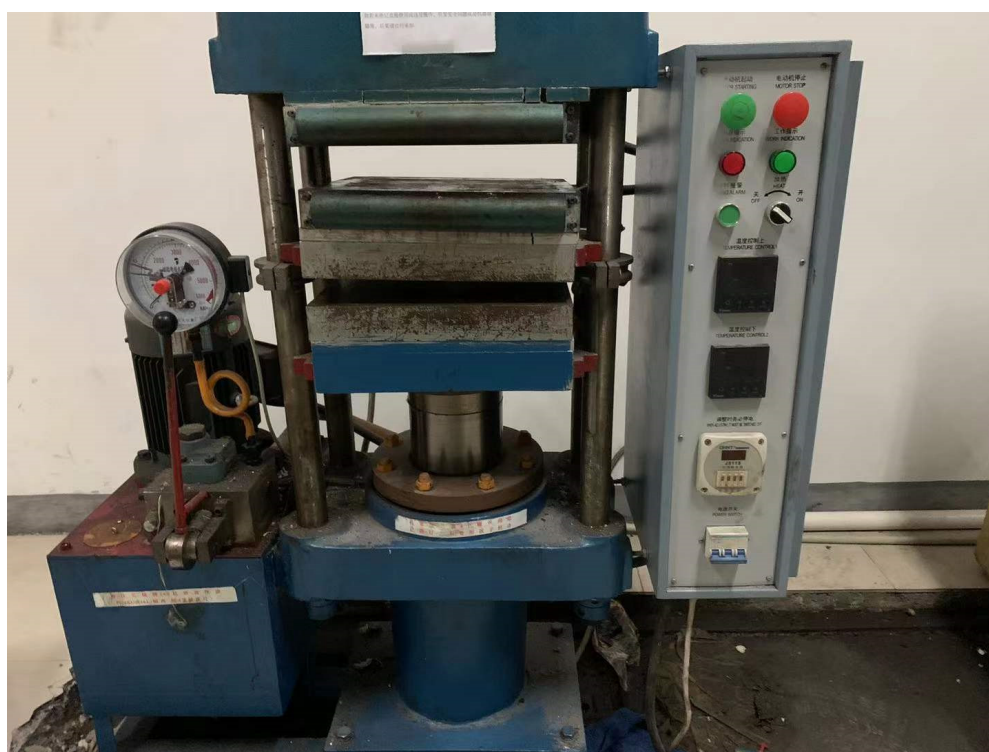

**Figure S3.** Flat vulcanizing machine.

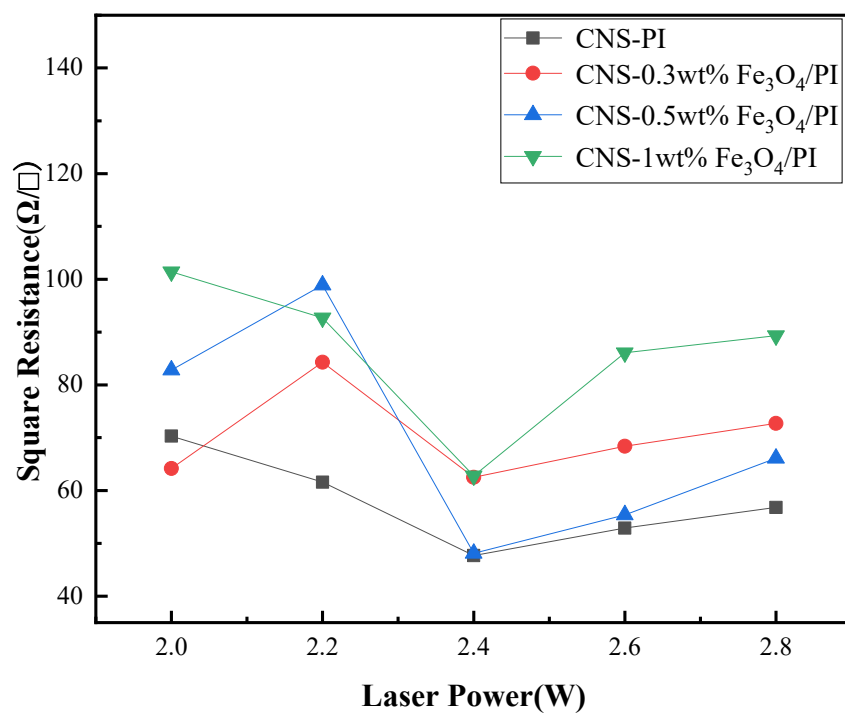

**Figure S4.** Square resistance of CNS-PI/ $\text{Fe}_3\text{O}_4$  under different laser power.

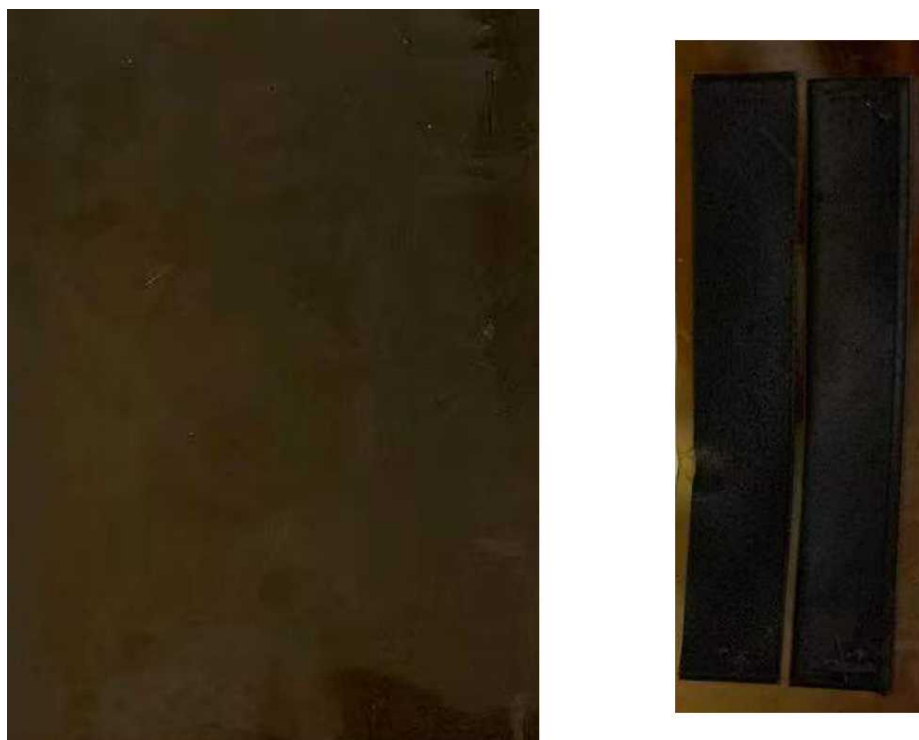

**Figure S5.** The photograph of  $\text{Fe}_3\text{O}_4/\text{PI}$  composite film before and after laser scribing.

**Movie S1. Laser Ablate Video**

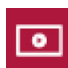

061fbd8f0f5a5a0c9feba0eb276fef8f.mp4
